# Supplementary material
Source: Research Square preprint supplement (doi:10.21203/rs.3.rs-9974636/v1)
Supplement: Supplementary file 1 [file 41040e17bccb5f5d6f7d9fe5.docx]

**Appendix A Interview question sheet**

1. How do you normally prepare for a new dialogue in your speaking and listening class? Do you use audio or video files?

2. For Unit 20, you received individualized computer-aided learning materials where you could visualize the contours of your tones while hearing corrected tones in your own voice. How did you use those materials to help you prepare for the new dialogues? Did you still use the audio or video files provided by the textbook?

3. How would you compare the audio files provided by the book and the individualized computer-aided materials generated by Praat? Do you find one of them more useful?

4. Does the introduction of these computer-aided materials change any of your learning behaviors? Did you find yourself spending more or less time on practicing using the files generated by Praat?

5. For the final skit project, how did you use the Praat-generated file to help you prepare for the final skit project?

6. You were also provided with audio files done by the two language fellows to help you prepare for the skit. Did you use those audio files? How would you compare those files done by the fellows and the ones generated by Praat? Did you find one of them more helpful?

7. Can you describe how you felt when you were using the Praat-generated learning materials? Does the fact you can hear the dialogue in your own voice make a difference?

8. Do you feel using these individualized computer-aided materials could help you better imagine yourself speaking and using the language?

9. Do you feel you have improved your tones in Chinese by using the computer-aided materials? How so?

10. Did using these individualized computer-aided materials increase your overall language learning motivation?

11. Did using these individualized computer-aided materials increase your overall confidence in learning Chinese?

12. If you could choose to have these individualized computer-aided materials for every new dialogue you study, would you do that?

13. Any other thoughts about this topic?

**Appendix B Themes, patterns and codes of interview data**

| **Theme** | **Pattern** | **Descriptive Code** |
| --- | --- | --- |
| 1. Alteration of explicit learning behaviors | 1. PM as adds-on to existent multimodal resources | 1. Written feedback of marked tone errors in addition to dialogue texts |
| 2. Corrected tone audios in addition to textbook dialogue audios produced by native speakers |
| 2. Increased time investment | 3. Active commitment stimulated by the study effect or interest in hearing one’s own voice |
| 4. Passive involvement due to increased learning materials or task effect |
| 3. Selective use of PM in multimodal formats | 5. Replacing previous learning audios, either textbook recordings or self-recordings |
| 6. Referring to visual tones while listening to audios |
| 7. Repeating to match pronunciation with PM audios |
| 8. Preferring audios to visual tones owing to the convenience of access |
| 2. Implicit FL self | 4. Self-image on tone pronunciation | 9. No better imagination due to background knowledge or preference for native human conversation |
| 10. Visualization of speaking contexts, including scenes and listening comprehension of interlocutors |
| 11. Objective records of self-talk as compared to that of native speakers in standard tones (and intonation) |
| 12. Potential for tool improvement |
| 5. Motivation in learning Mandarin Chinese tones | 13. Not sure about any increase or decrease because of the disciplined personality or already high motivation |
| 14. More self-consciousness of errors and setting aside time to practice tones |
| 15. A new technique (i.e., PM) as a stimulating add-on to tone practice and improvement |
| 6. Confidence in speaking Chinese as an FL | 16. No change due to shorter exposure to PM and more self-consciousness of errors or gaps between self-talk and standard tones |
| 17. More attainable goals of pronouncing tones, owing to the slower pace and more authentic sounds of PM |
| 18. Increased due to tailored feedback on specific areas for tone improvement |
| 3. Benefits of PM | 7. Cognitive: error pinpointing and meaning construction | 19. Highlighting tone errors by corrected audios (positions and unnaturalness sometimes) and marked characters in written scripts—multimodal feedback |
| 20. Easier to understand and memorize the lines |
| 8. Practical: pronunciation aids and references | 21. Slower speaking speed, the same pitch range, and personal inflections to follow and mimic |
| 22. Models or goals for standard pronunciation in one’s own voices |
| 9. Metacognitive: time management and engagement | 23. More commitment to tone practice and repetition of certain tones and tone combinations |
| 24. Emerging self-awareness and reflection on tone errors |
| 25. Increased confidence and feeling of accomplishment after discovering what is pronounced right or wrong and how they could be fixed in one’s own voices |
| 4. Fitness of PM for tone feedback | 10. Technical issues | 26. Unnaturalness of tone correction |
| 27. Lack of emotional inflection and intonation in human conversation |
| 28. Weird to hear one’s self-talk as pronunciation feedback from a physical point of view |
| 11. Impact of learning backgrounds and styles | 29. Heritage vs. non-heritage, that is, growing up in Mandarin-speaking communities or not |
| 30. Audiovisual learners & recording oneself to practice |
| 31. Scaffoldings needed to navigate through tone practice |
| 12. Levels of proficiency and motivation | 32. Beginners of Mandarin Chinese |
| 33. Triggering discouragement even for highly motivated and hardworking students |
| 13. Purposes of use | 34. Learning new vocabulary and dialogues |
| 35. Tone accuracy of individual words |
| 36. Natural conversation with different interlocutors |
